1 Article type: Research

2

3 Title: Whole genome sequencing *Mycobacterium tuberculosis* directly from sputum

4 identifies more genetic diversity than sequencing from culture

5

6 Authors:

Camus Nimmo<sup>1,2\*</sup>

Liam P. Shaw<sup>3,4</sup>

Ronan Doyle<sup>1</sup>

Rachel Williams<sup>1</sup>

Kayleen Brien<sup>2</sup>

Carrie Burgess<sup>1</sup>

Judith Breuer<sup>1</sup>

Francois Balloux<sup>3</sup>

Alexander S. Pym<sup>2</sup>

7

8 1. Division of Infection and Immunity, University College London, London WC1E 6BT,

9 UK

10 2. Africa Health Research Institute, Durban, South Africa

11 3. UCL Genetics Institute, University College London, London WC1E 6BT, UK

12 4. Nuffield Department of Clinical Medicine, Oxford University, Oxford OX3 7BN, UK

13 \*Corresponding author

14

15 Corresponding author email: [c.nimmo.04@cantab.net](mailto:c.nimmo.04@cantab.net)

16 **Abstract**

17

18 **Background**

19 Repeated culture reduces within-sample *Mycobacterium tuberculosis* genetic diversity due  
20 to selection of clones suited to growth in culture and/or random loss of lineages, but it is  
21 not known to what extent omitting the culture step altogether alters genetic diversity. We  
22 compared *M. tuberculosis* whole genome sequences generated from 33 paired clinical  
23 samples using two methods. In one method DNA was extracted directly from sputum then  
24 enriched with custom-designed SureSelect (Agilent) oligonucleotide baits and in the other it  
25 was extracted from mycobacterial growth indicator tube (MGIT) culture.

26

27 **Results**

28 DNA directly sequenced from sputum showed significantly more within-sample diversity  
29 than that from MGIT culture (median 5.0 vs 4.5 heterozygous alleles per sample,  $p=0.04$ ).  
30 Resistance associated variants present as HAs occurred in four patients, and in two cases  
31 may provide a genotypic explanation for phenotypic resistance.

32

33 **Conclusions**

34 Culture-free *M. tuberculosis* whole genome sequencing detects more within-sample  
35 diversity than a leading culture-based method and may allow detection of mycobacteria  
36 that are not actively replicating.

37

38 Key words: *Mycobacterium tuberculosis*; drug-resistant tuberculosis; whole genome  
39 sequencing; sputum; within-patient diversity; heteroresistance

## 40 Background

41

42 International efforts to reduce tuberculosis (TB) infections and mortality over the last two  
43 decades have only been partially successful. In 2017, 10 million people developed TB and it  
44 has overtaken HIV as the infectious disease responsible for the most deaths worldwide(1,  
45 2). Drug resistance is a major concern with a steady rise in the number of reported cases  
46 globally and rapid increases in some areas(1). Patients with *Mycobacterium tuberculosis*  
47 resistant to the first line drugs rifampicin and isoniazid are classed as having multidrug-  
48 resistant (MDR) TB and usually treated with a standardised second line drug regimen for at  
49 least nine months, which is also used for rifampicin mono-resistance(3, 4). With the  
50 emergence of resistance to fluoroquinolones and aminoglycosides (extensively drug-  
51 resistant [XDR] TB) there is an increasing need for individualised therapy based on drug  
52 susceptibility testing (DST). Individualised therapy ensures patients are treated with  
53 sufficient active drugs which can prevent selection of additional resistance, improve  
54 treatment outcomes and reduce duration of infectiousness(5-8).

55

56 Traditionally, phenotypic culture-based DST was used to identify drug resistance but this is  
57 being replaced by rapid genetic tests that detect specific drug resistance-conferring  
58 mutations. Next generation whole genome sequencing (WGS) of *M. tuberculosis* is being  
59 increasingly used in research and clinical settings to comprehensively identify all drug  
60 resistance associated mutations(9). *M. tuberculosis* has a conserved genome with little  
61 genetic diversity between strains and no evidence of horizontal gene transfer(10), but more  
62 detailed analysis of individual patient samples with WGS has identified genetically separate  
63 bacterial subpopulations in sequential sputum samples(11-16) and across different

64 anatomical sites(17). This within-patient diversity can occur as a result of mixed infection  
65 with genetically distinct strains or within-host evolution of a single infecting strain(18).  
66  
67 Bacterial subpopulations can be detected in clinical samples after sequencing reads are  
68 mapped to a reference genome where multiple base calls are detected at a single genomic  
69 site. These heterozygous alleles (HAs) at sites associated with drug resistance (resistance  
70 associated variants, RAVs) may reflect heteroresistance, where a fraction of the total  
71 bacterial population is drug susceptible while the remainder is resistant(19). Identification  
72 of genetic diversity within clinical samples may improve detection of RAVs over currently  
73 available rapid genetic tests(19) and can be achieved with freely available WGS analysis  
74 toolkits(20-22). Identifying RAVs could improve individualised therapy, prevent acquired  
75 resistance(12), and give insight into bacterial adaptation to the host.

76  
77 *M. tuberculosis* WGS is usually performed on fresh or stored frozen cultured isolates to  
78 obtain sufficient purified mycobacterial DNA(23, 24). However, the culture process can  
79 change the population structure from that of the original sample due to genetic drift  
80 (random loss of lineages) and/or the selection of subpopulations more suited to growth in  
81 culture(25-27). Repeated subculture leads to loss of genetic diversity and  
82 heteroresistance(28). Additionally, in the normal course of *M. tuberculosis* infection, some  
83 bacteria exist as viable non-culturable persister organisms that are hypothesised to cause  
84 the high relapse rate seen following treatment of insufficient duration. Although these  
85 organisms may be identified in sputum by techniques such as reporter phages or culture  
86 with resuscitation promoting factors(29, 30) they are likely to be missed by any sequencing  
87 method reliant on standard culture.

88

89 WGS directly from sputum without enrichment is challenging(23). It has recently been  
90 improved by depleting human DNA during DNA extraction(31). We have previously reported  
91 the use of oligonucleotide enrichment technology SureSelect (Agilent, CA, USA) to sequence  
92 *M. tuberculosis* DNA directly from sputum(32) and demonstrated its utility in determining a  
93 rapid genetic drug resistance profile(33, 34).

94

95 It remains unclear to what extent WGS of cultured *M. tuberculosis* samples underestimates  
96 the genetic diversity of the population in sputum samples. One previous study of 16 patients  
97 did not identify increased genetic diversity in *M. tuberculosis* DNA sequenced directly from  
98 sputum compared to DNA from culture(31), whereas another study of mostly drug  
99 susceptible patients showed sequencing directly from sputum identified a slight excess of  
100 HAs relative to culture(33). Here we reanalyse heterozygous alleles (HAs) for the 12  
101 available paired sequences with >60-fold mean genome coverage from that study(33) in  
102 addition to 21 newly collected samples from patients with MDR-TB and further explore the  
103 genomic location of the additional diversity identified.

104

## 105 Results

106

### 107 Patient Characteristics and Drug Susceptibility Testing

108

109 Whole genome sequences were obtained for 33 patients from both mycobacterial growth  
110 indicator tube (MGIT) culture and direct sputum sequencing. The patients were  
111 predominantly of black African ethnicity (83%) and 50% were HIV positive. First line

112 phenotypic drug susceptibility testing (DST) results identified 20 patients with MDR-TB and  
113 one with rifampicin mono-resistance. In addition there were two isoniazid mono-resistant  
114 patients and ethambutol resistance was detected in 7 patients. Second-line phenotypic DST  
115 was performed for patients with rifampicin-resistant or MDR-TB and identified one case of  
116 kanamycin resistance (Table 1).

117

118 All samples had mean genome coverage of 60x or above with at least 85% of the genome  
119 covered at 20x (Supplementary Material: Table 1). We observed greater mean coverage  
120 depth in sputum-derived sequences than MGIT sequences (median 173.7 vs 142.4,  $p=0.03$ ,  
121 Supplementary Material: Table 1), and so mapped reads were randomly downsampled to  
122 give equal mean coverage depth in each pair. A genotypic susceptibility profile was  
123 determined by evaluating MGIT WGS for consensus-level RAVs using a modified version of  
124 publicly available lists(22, 35). Genotypic RAVs predicted all rifampicin phenotypic resistance  
125 and >95% of isoniazid phenotypic resistance. Ethambutol genotypic RAVs were poorly  
126 predictive of phenotypic resistance in line with findings from other studies(36) (Table 1).

127 The patient with kanamycin phenotypic resistance was correctly identified by an *rrs* a1401g  
128 RAV. No full phenotypic fluoroquinolone phenotypic resistance was identified, but several  
129 colonies from patient F1013 did grow in the presence of ofloxacin (although not enough to  
130 be classified as resistant). The consensus sequences from this patient harboured a *gyrB*  
131 E501D mutation which is believed to confer resistance to moxifloxacin but not other  
132 fluoroquinolones, which may explain the borderline phenotypic DST result(37).

133

#### 134 **Genetic Diversity**

135

136 To compare consensus sequences from sputum and MGIT, a WGS consensus sequence-level  
137 maximum likelihood phylogenetic tree was constructed (Supplementary Material: Figure 1).  
138 As expected, all paired sequences were closely related, with a median difference of 0.0  
139 (range 0-1) single nucleotide polymorphisms (SNPs). Samples from patients F1066 and  
140 F1067 were closely related with only one consensus-level SNP separating all four consensus  
141 sequences. There was no obvious epidemiological link between these patients (although  
142 this study was not designed to collect comprehensive epidemiological information) and they  
143 lived 20km apart in Durban. However, both patients were admitted contemporaneously to  
144 an MDR treatment facility and sampled on the same day. DNA extraction and sequencing  
145 occurred on different runs. Therefore the close genetic linkage may represent direct  
146 transmission within a hospital setting, a community transmission chain or an unlikely cross-  
147 contamination during sample collection.

148

149 Having established congruence between sputum and MGIT sequences at the consensus  
150 level we then compared genetic diversity by DNA source. We first defined a threshold for  
151 calling variants present as heterozygous alleles (HAs) in our entire dataset by using a range  
152 of minimum read count frequencies as described in the methods (Figure 1). Below a  
153 minimum of three supporting reads there was an exponential increase in the number of HAs  
154 identified, which may be indicative of the inclusion of sequencing errors. To reduce this risk,  
155 we used a threshold of a minimum of four supporting reads.

156

157 Genetic diversity may occur because of within-host evolution or mixed infection. To identify  
158 mixed infection we used a SNP-based barcode(38) to scan all HAs for a panel of 413 robust  
159 phylogenetic SNPs that can resolve *M. tuberculosis* into one of seven lineages and 55 sub-

160 lineages. We found three phylogenetic SNPs among the HAs. In all cases the heterozygous  
161 phylogenetic SNP originated from the same sublineage as other SNPs present at 100%  
162 frequency, and there were no cases of HAs indicating the presence of more than one lineage  
163 or sublineage. We screened for mixed infection with the same sublineage by screening  
164 samples by HA frequency and then using Bayesian model based clustering in samples with  
165  $\geq 10$  HAs as described previously(39). This identified mixed infection in the sputum sample  
166 from patient F1096, which had 261 heterozygous alleles, greater than ten times that in any  
167 other sample. This patient was therefore excluded from further analyses.

168

169 As a first step to comparing diversity between sputum and MGIT sequenced samples we  
170 looked at the location of genetic diversity within the *M. tuberculosis* genome. HAs were  
171 widely dispersed across the genome at similar sites in both sputum and MGIT samples. The  
172 genes with the greatest density of HAs are shown in Table 2.

173

174 Notably, genetic diversity was found in the ribosomal RNA (rRNA) genes (*rrs* and *rrl*)  
175 uniquely in sputum samples, compared to other genes where distribution of diversity  
176 between MGIT and sputum was more balanced. As rRNA contains regions that are highly  
177 conserved across bacteria(40), we considered the possibility that SureSelect baits targeting  
178 rRNA genes were capturing both *M. tuberculosis* and other bacterial species. To evaluate  
179 this, metagenomic taxonomic assignment was performed on all reads by sampling reads  
180 that were not assigned to *M. tuberculosis* (i.e. presumed contaminants from other bacteria).  
181 We then performed a BLAST search against the most diverse genes listed in Table 2 which  
182 indicated that a sizeable proportion of non-*M. tuberculosis* reads from directly sequenced  
183 sputum had a BLAST hit of at least 30 bases to *M. tuberculosis* *rrs* and *rrl* genes that encode



184 rRNA (330 BLAST hits from sputum sequences vs 4 BLAST hits from MGIT sequences, median  
185 8.5% vs 0.0%,  $p < 0.01$ , Supplementary Material: Figure 2). There were no BLAST hits against  
186 any of the other genes with  $\geq 2$  sputum HAs apart from *rpoC*, for which there were 3 BLAST  
187 hits from sputum sequences but none from MGIT sequences (median 0.0% for both sputum  
188 and MGIT sequences), indicating that this issue appears largely specific to rRNA. To  
189 determine if contaminating reads were contributing to HAs identified in intergenic regions,  
190 we repeated this analysis for all intergenic regions with  $\geq 2$  sputum HAs (Supplementary  
191 Material: Table 2). There were no BLAST hits to any of these regions, suggesting that this is  
192 not the case. The taxonomic assignment of these contaminating reads were typical of  
193 genera composing the oral flora, with a high representation of *Actinomyces*, *Fusobacterium*,  
194 *Prevotella*, and *Streptococcus* (Supplementary Material: Figure 3).

195

196 This supported the hypothesis that the baits may enrich rRNA from other organisms so rRNA  
197 genes were excluded from further analysis. The difference in diversity between sputum and  
198 MGIT sequences can be explained by the selective nature of MGIT media which will enrich  
199 *M. tuberculosis* sequences and the decontamination step used to kill non-mycobacteria  
200 prior to culture inoculation. Importantly the frequency of HAs in other highly diverse genes  
201 between sequencing strategies was more balanced (Table 2) in addition to the lack of BLAST  
202 hits of contaminating reads to these genes.

203

204 After excluding the sample with mixed infection and removing rRNA gene sequences we  
205 compared the frequency of HAs in sputum and MGIT. There were 265 HAs identified across  
206 all sputum samples compared to 200 in MGIT samples (median 5.0 vs 4.5,  $p = 0.04$ ,  
207 Supplementary Material: Table 1). In both sputum and MGIT samples, the majority of HAs

208 were indels, and non-synonymous mutations were more commonly frameshift than  
209 missense mutations (Table 3). The distribution of HAs by patient is shown in Figure 2.

210

### 211 **Genetic diversity in drug resistance genes**

212

213 HAs in drug resistance associated regions, including promoters and intergenic regions, were  
214 individually assessed. Four of the 32 patients with single strain infection had RAVs present  
215 as HAs in at least one gene, which are shown in Table 4. Patient F1002 had three  
216 compensatory mutations in *rpoC* present at HAs in both sequences. As described above, the  
217 strains from patients F1066 and F1067 were highly related with only one consensus SNP  
218 difference between all four sequences. Both had phenotypic high level isoniazid resistance  
219 with no consensus-level *katG* or *inhA* mutation, but had frameshift *katG* mutations present  
220 as HAs which have the potential to cause resistance(41). F1066 and RF021 had *Rv1979c* and  
221 *pncA* mutations respectively at low frequency in sputum only which have the potential to  
222 confer phenotypic resistance to clofazimine (*Rv1979c*) and pyrazinamide (*pncA*), although  
223 no phenotypic testing was performed for these drugs.

224

## 225 **Discussion**

226

227 In this study we performed whole genome sequencing using DNA from sputum and MGIT  
228 culture in paired samples from 33 patients and compared within-patient genetic diversity  
229 between methods. All paired sequences were closely related at the consensus level, and  
230 WGS predicted phenotypic drug susceptibility with over 95% sensitivity and specificity for  
231 rifampicin and isoniazid in line with published data(42).

232

233 We find that the rRNA genes have high levels of diversity in sputum samples, but believe  
234 this is due to non-mycobacterial DNA hybridising to the capture baits. This conclusion is  
235 borne out by the taxonomic assignment of reads aligning to these genes in common oral  
236 bacteria. We therefore excluded these from further analysis, and recommend others using  
237 enrichment from sputum do similarly. We find more diversity when sequencing directly  
238 from sputum with significantly more unique heterozygous alleles (HAs) than sequencing  
239 from MGIT culture ( $p=0.04$ ).

240

241 The understanding of within-patient *M. tuberculosis* genetic diversity is becoming  
242 increasingly important as the detection of rare variants has been shown to improve the  
243 correlation between phenotypic and genotypic drug resistance profiles(19) and can identify  
244 emerging drug resistance(11, 12). Not including a culture step avoids the introduction of  
245 bias towards culture-adapted subpopulations and the impact of random chance and is also  
246 likely to incorporate DNA from viable non-culturable mycobacteria. A reduction in genetic  
247 diversity has previously been shown with sequential *M. tuberculosis* subculture(25, 28), but  
248 was not confirmed by a study performing WGS directly from sputum(31). However, the 16  
249 paired sputum and MGIT samples compared by Votintseva(31) had a minimum of 5x  
250 coverage compared to a minimum 60x coverage in this study, and were likely to contain less  
251 genetic material as they were surplus clinical rather than dedicated research samples.

252

253 Two-thirds of the patients with MDR-TB had already been treated for drug susceptible-TB  
254 (DS-TB), and additional diversity in sputum samples may represent early adaptation to drug  
255 pressure. As direct sputum sequencing does not rely on live mycobacteria, DNA from

256 recently killed *M. tuberculosis* is likely to also be sequenced, meaning that recent genomic  
257 mutations are likely to be represented as HAs.

258

259 In two patients, RAVs present as HAs provided a likely genotypic basis for otherwise  
260 unexplained phenotypic resistance. Given the small total number of resistance mutations in  
261 this study, it is not possible to draw conclusions about the frequency of heterozygous RAVs  
262 in directly sequenced sputum. However the presence of heterozygous RAVs in both MGIT  
263 and sputum sequences reinforces the biological importance of these mutations.

264

265 To reduce the risk of sample cross contamination, paired samples were extracted on  
266 different days, prepared in different sequencing libraries and sequenced on different runs.  
267 However it is not possible to completely exclude the possibility of contamination during  
268 sample collection and between different samples processed in batches. A further limitation  
269 of this study is that it can be difficult to distinguish low frequency variants from sequencing  
270 error. The SureSelect library preparation protocol for sputum sequencing incorporates more  
271 PCR cycles than that used for MGIT sequencing, which may increase the risk of error. Where  
272 possible this could be evaluated further by performing technical sequencing replicates on  
273 extracted DNA samples, although this was not possible due to insufficient surplus material  
274 and financial constraints. To reduce the risk of sequencing errors we used high read and  
275 mapping quality thresholds, and required a stringent 98% identity between sequenced  
276 reads and the reference genome. Low frequency variants of particular clinical importance  
277 could be confirmed by resequencing the same DNA samples.

278

## 279 Conclusions

280

281 Directly sequencing *M. tuberculosis* from sputum is able to identify more genetic diversity  
282 than sequencing from culture. Understanding within-patient genetic diversity is important  
283 to understand bacterial adaptation to drug treatment and the acquisition of drug resistance.  
284 It also has potential to identify low frequency RAVs that may further enhance the prediction  
285 of drug resistance phenotype from genotype.

286

## 287 Methods

288

### 289 Patient enrolment

290 Adult patients presenting with a new diagnosis of sputum culture positive TB were included  
291 in the study. Patients were recruited in London, UK (n=12) and Durban, South Africa (n=21).  
292 All patients recruited in Durban were Xpert MTB/RIF (Cepheid, CA, USA) positive for  
293 rifampicin resistance. Two sputum samples were collected prior to starting the current  
294 treatment regimen, with one inoculated into mycobacterial growth indicator tube (MGIT)  
295 culture (BD, NJ, USA) and the other used for direct DNA extraction. Therefore for patients  
296 with drug susceptible-TB (DS-TB), sputum was collected prior to taking any TB therapy,  
297 while patients starting MDR-TB treatment may have already taken treatment for DS-TB if  
298 this was initiated prior to resistance results being available.

299

### 300 Ethics, Consent and Permissions

301 All patients gave written informed consent to participate in the study. Ethical approval for  
302 the London study was granted by NHS National Research Ethics Service East Midlands–

303 Nottingham 1 (reference 15/EM/0091). Ethical approval for the Durban study was granted  
304 by University of KwaZulu-Natal Biomedical Research Ethics Committee (reference  
305 BE022/13).

306

### 307 **Microbiology**

308 MGIT samples were incubated in a BACTEC MGIT 960 (BD, NJ, USA) until flagging positive.  
309 Phenotypic DST data for London samples were those provided to treating hospitals by Public  
310 Health England. Phenotypic DST were performed using equivalent standardised methods.  
311 For Durban samples this was the solid agar proportion method (Supplementary Material:  
312 Methods) and for London samples the resistance ratio method(43).

313

### 314 **DNA extraction and sequencing**

315 Positive MGIT tubes were centrifuged at 16,000g for 15 minutes and the supernatant  
316 removed. Cells were resuspended in phosphate-buffered saline before undergoing heat  
317 killing at 95°C for 1 hour followed by centrifugation at 16,000g for 15 minutes. The  
318 supernatant was removed and the sample resuspended in 1mL sterile saline (0.9% w/v). The  
319 wash step was repeated. DNA was extracted with mechanical ribolysis before purification  
320 with DiaSorin Liaison Ixt (DiaSorin, Italy) or CTAB(44). NEBNext Ultra II DNA (New England  
321 Biolabs, MA, USA) was used for DNA library preparation.

322

323 Sputum samples for direct sequencing were heat killed, centrifuged at 16,000g for 15  
324 minutes and the supernatant was removed. DNA extraction was performed with mechanical  
325 ribolysis followed by purification using DiaSorin Liaison Ixt (DiaSorin, Italy) or DNeasy blood  
326 & tissue kit (Qiagen, Germany)(44). Target enrichment was performed using SureSelect with

327 a custom-designed bait set covering the entire positive strand of the *M. tuberculosis*  
328 genome as described previously(33). Batches of 48 multiplexed samples were sequenced on  
329 NextSeq 500 (Illumina, CA, USA) 300-cycle paired end runs with a mid-output kit.  
330 Sequencing was performed by the Pathogen Genomics Unit at University College London in  
331 a dedicated laboratory where one sequencing run was processed at a time. All paired  
332 samples were extracted, prepared and sequenced on different days. The National Center for  
333 Biotechnology Information Sequence Read Archive (NCBI SRA) accession number for each  
334 sample is shown in Supplementary Material: Table 3.

335

### 336 **Read mapping**

337 DNA sequence reads were adapter and quality trimmed then aligned to the H37Rv  
338 reference genome (GenBank accession NC\_000962.3) with Trim Galore v0.4.4(45) and  
339 BBDMap v38.32(46), with mapped reads stored in an output bam file. Duplicate reads were  
340 removed with Picard tools v1.130(47) MarkDuplicates and coverage statistics generated  
341 with Qualimap v2.2.1(48). For each sample pair, the bam file with greater mean genome  
342 coverage was randomly downsampled to that of the paired sample with Picard tools  
343 v1.130(47) DownsampleSam. All further analyses were performed using these  
344 downsampled bam files. Command line parameters used are specified in the Supplementary  
345 Material: Methods.

346

### 347 **Variant calling**

348 Variant calling for comparison for HA counts was performed with FreeBayes v1.2(49).  
349 Variants falling in or within 50 bases of PE/PPE family genes and repeat elements were  
350 excluded using vcfintereseect in vcfliib(50). For the initial analysis of genetic diversity, variants

351 were included if supported by  $\geq 2$  reads, with  $\geq 1$  forward and reverse read, no read position  
352 bias, a minimum mapping quality of 30 and base quality of 30. The minimum supporting  
353 read threshold was then increased in a stepwise fashion from 2 to 15. Variant calling files  
354 where variants were supported  $\geq 4$  supporting reads including  $\geq 1$  forward and reverse read  
355 were used to compare HA frequency and location and to screen for mixed infection.

356

357 The phylogenetic tree was constructed by calling variants with VarScan v2.4.0(51)  
358 mpileup2cns as this is able to generate consensus-level calls at each reference sequence  
359 base. SNPs were then used to generate a sequence of equal length to the reference using a  
360 custom perl script and these sequences were combined in a multi-alignment fasta file. SNP  
361 sites were extracted from this alignment using snp-sites v2.4.1(52), and pairwise SNP  
362 differences calculated using snp-dists v0.6.3(53). Extracted SNP sites were used to generate  
363 a maximum likelihood phylogenetic tree using RaxML v8.2.12(54) which was visualised using  
364 FigTree v1.4.3.

365

### 366 **Identification of Mixed Infection**

367 All samples were screened for evidence of mixed infection using described methods(39). In  
368 brief, any sample with 10 or fewer heterozygous SNPs, or between 11 and 20 heterozygous  
369 SNPs where heterozygous SNPs were  $\leq 1.5\%$  of all SNPs was classified as not mixed. For  
370 other samples, the Bayesian mixture model analysis(39) was used where samples with a  
371 Bayesian information criterion value  $> 20$  for presence of more than one strain were  
372 assumed to be mixed.

373

### 374 **Metagenomic assignment**



375 Sequencing reads were classified using Kraken v0.10.6(55) against a custom Kraken  
376 database previously constructed from all available RefSeq genomes for bacteria, archaea,  
377 viruses, protozoa, and fungi, as well as all RefSeq plasmids (as of September 19<sup>th</sup> 2017) and  
378 three human genome reference sequences(56). The size of the final database after shrinking  
379 was 193 Gb, covering 38,190 distinct NCBI taxonomic IDs.

380

381 To assess the proportion of contaminating reads that could generate spurious diversity  
382 when mapped to *M. tuberculosis* ribosomal genes, we randomly subsampled 100 reads  
383 taxonomically assigned as non-*M. tuberculosis* and performed a BLAST search with blastn  
384 v2.2.28(57) against each gene as described from the H37Rv reference genome. We only  
385 analysed hits of at least 30 bases.

386

### 387 **Statistics**

388 Statistical analyses were performed with Prism v8.0 (Graphpad, CA, USA). Mean coverage  
389 depth statistics, number of HAs and BLAST hits of contaminating reads in paired samples  
390 were compared using a two-tailed Wilcoxon matched-pairs signed rank test.

391

### 392 **Abbreviations**

393

|        |                                  |
|--------|----------------------------------|
| DST    | drug susceptibility testing      |
| DS-TB  | drug susceptible-tuberculosis    |
| HA     | heterozygous allele              |
| MDR-TB | multidrug resistant-tuberculosis |

|      |                                     |
|------|-------------------------------------|
| MGIT | mycobacterial growth indicator tube |
| RAV  | Resistance associated variant       |
| rRNA | ribosomal RNA                       |
| SNP  | single nucleotide polymorphism      |
| TB   | tuberculosis                        |
| WGS  | whole genome sequencing             |

394

395

396

397 **Declarations**

398

399 **Ethics approval and consent to participate**

400 All patients gave written informed consent to participate in the study. Ethical approval for  
401 the London study was granted by NHS National Research Ethics Service East Midlands—  
402 Nottingham 1 (reference 15/EM/0091). Ethical approval for the Durban study was granted  
403 by University of KwaZulu-Natal Biomedical Research Ethics Committee (reference  
404 BE022/13).

405

406 **Consent for publication**

407 Not applicable

408

409 **Availability of data and materials**

410 Original fastq files are available at NCBI Sequence Read Archive with BioProject reference  
411 PRJNA486713: <https://www.ncbi.nlm.nih.gov/bioproject/PRJNA486713/>

412

413 **Competing interests**

414 The authors declare that they have no competing interests.

415

416 **Funding**

417 Camus Nimmo is funded by a Wellcome Trust Research Training Fellowship reference  
418 203583/Z/16/Z. This work was additionally funded by National Institute for Health Research  
419 via the UCLH/UCL Biomedical Research Centre (grant number BRC/176/III/JB/101350) and  
420 the PATHSEEK European Union's Seventh Programme for research and technological

421 development (grant number 304875). The funding bodies had no input on study design,  
422 analysis, data interpretation or manuscript writing.

423

#### 424 **Authors' contributions**

425 Study conception: JB, ASP

426 Data collection: CB, KB

427 Analysis and interpretation: CN, LPS, RD, RW

428 Drafting of manuscript: CN, LPS

429 Revision of manuscript: FB, JB, ASP

430 Final approval of manuscript: CN, LPS, RD, RW, KB, CB, JB, FB, ASP

431

#### 432 **Acknowledgements**

433 The authors would like to thank Sashen Moodley, Ashentha Govender and Colin Chetty in  
434 the Microbiology Core, Africa Health Research Institute.

435 **Tables**

436

| <b>Drug</b>                     | <b>Resistance by phenotypic DST</b> | <b>Resistance by genotypic DST</b> | <b>Genotypic DST sensitivity</b> | <b>Genotypic DST specificity</b> |
|---------------------------------|-------------------------------------|------------------------------------|----------------------------------|----------------------------------|
| <b><i>First line drugs</i></b>  |                                     |                                    |                                  |                                  |
| Rifampicin                      | 21/32 (65.6%)                       | 21/33 (63.6%)                      | 21/21 (100%)*                    | 21/21 (100%)                     |
| Isoniazid                       | 22/32 (68.8%)                       | 24/36 (66.7%)                      | 21/22 (95.5%)                    | 23/24 (95.8%)                    |
| Ethambutol                      | 7/31 (22.6%)                        | 15/34 (44.1%)                      | 7/7 (100%)                       | 7/15 (46.7%)                     |
| <b><i>Second line drugs</i></b> |                                     |                                    |                                  |                                  |
| Ofloxacin                       | 0/22 (0.0%)                         | 1/22 (4.5%)                        | N/A                              | 0/1 (0%)**                       |
| Kanamycin                       | 1/22 (4.5%)                         | 1/22 (4.5%)                        | 1/1 (100%)                       | 1/1 (100%)                       |

437

438 Table 1. Phenotypic and genotypic drug susceptibility testing (DST) results and sensitivity  
 439 and specificity of genotypic DST relative to phenotypic DST. Phenotypic DST available for  
 440 first line drugs for 32 of the 33 patients, and for second line drugs for 22 patients who  
 441 demonstrated rifampicin drug resistance. \*In one directly-sequenced sputum samples  
 442 rifampicin RAVs were missed due to low coverage, although they were identified in the  
 443 corresponding MGIT sample. \*\*This sample had <1% of colonies grow in the presence of  
 444 ofloxacin, so is categorised as sensitive but may have low-level or heteroresistance to  
 445 fluoroquinolones (see main text).

446

447

| Gene           | Heterozygous alleles |       | Total number of heterozygous alleles |      | Functional category          |
|----------------|----------------------|-------|--------------------------------------|------|------------------------------|
|                | per base             |       |                                      |      |                              |
|                | Sputum               | MGIT  | Sputum                               | MGIT |                              |
| <i>rv1319c</i> | 0.021                | 0.021 | 33                                   | 33   | Metabolism and respiration   |
| <i>rrs</i>     | 0.016                | 0.000 | 25                                   | 0    | 16S ribosomal RNA            |
| <i>rriI</i>    | 0.006                | 0.000 | 19                                   | 0    | 23S ribosomal RNA            |
| <i>ppsA</i>    | 0.003                | 0.001 | 15                                   | 4    | Lipid metabolism             |
| <i>rv2082</i>  | 0.006                | 0.006 | 13                                   | 14   | Unknown function             |
| <i>accE5</i>   | 0.006                | 0.000 | 3                                    | 0    | Lipid metabolism             |
| <i>lppB</i>    | 0.005                | 0.005 | 3                                    | 3    | Probable surface lipoprotein |
| <i>pks12</i>   | 0.000                | 0.001 | 3                                    | 10   | Lipid metabolism             |
| <i>rv2319c</i> | 0.003                | 0.005 | 3                                    | 4    | Stress protein               |
| <i>lppA</i>    | 0.003                | 0.002 | 2                                    | 1    | Probable surface lipoprotein |
| <i>rpoC</i>    | 0.001                | 0.001 | 2                                    | 3    | RNA polymerase beta' subunit |
| <i>rv3888c</i> | 0.002                | 0.001 | 2                                    | 1    | Probable membrane protein    |
| <i>vapC25</i>  | 0.005                | 0.000 | 2                                    | 0    | Possible toxin               |
| <i>vapC31</i>  | 0.005                | 0.002 | 2                                    | 1    | Possible toxin               |

448

449 Table 2. Genes with  $\geq 2$  heterozygous alleles (HAs) across all sputum samples, ordered by  
450 greatest number of HAs per base.

451

|                                                        | <b>Sputum variants</b> | <b>MGIT variants</b> |
|--------------------------------------------------------|------------------------|----------------------|
| Total variants                                         | 24480                  | 25465                |
| Total variants present as HAs<br>(% of total variants) | 265 (1.1%)             | 200 (0.8%)           |
| Median HAs per sample                                  | 5.0                    | 4.5                  |
| Variant type (% all HAs)                               |                        |                      |
| SNP                                                    | 217 (81.9%)            | 174 (87.0%)          |
| MNP                                                    | 2 (0.8%)               | 0 (0.0%)             |
| Insertion                                              | 4 (1.5%)               | 1 (0.5%)             |
| Deletion                                               | 24 (9.1%)              | 15 (7.5%)            |
| Complex                                                | 18 (6.8%)              | 10 (5.0%)            |
| Coding change (% all HAs)                              |                        |                      |
| Non-synonymous (missense)                              | 93 (35.1%)             | 77 (38.5%)           |
| Non-synonymous (frameshift)                            | 6 (2.3%)               | 7 (3.5%)             |
| Synonymous                                             | 57 (21.5%)             | 57 (28.5%)           |
| Intergenic                                             | 109 (41.1%)            | 59 (29.5%)           |

452

453 Table 3. Variants identified in MGIT and sputum derived sequences from paired samples.

454 Values given represent totals for 32 paired samples. SNP = single nucleotide polymorphism;

455 MNP = multi-nucleotide polymorphism.

456



457

| Patient ID | Phenotypic resistance         | Mutation               | Frequency (MGIT/sputum) | Description                                             |
|------------|-------------------------------|------------------------|-------------------------|---------------------------------------------------------|
| F1002      | Rifampicin                    | <i>rpoB</i> S450L      | 100%/100%               | High confidence resistance mutation                     |
| F1002      | Rifampicin                    | <i>rpoC</i> G332R(58)  | 82.6%/21.7%             | Putative compensatory mutations                         |
| F1002      | Rifampicin                    | <i>rpoC</i> L516P(58)  | 12.7%/7.7%              |                                                         |
| F1002      | Rifampicin                    | <i>rpoC</i> P1040S(59) | 21.7%/12.3%             |                                                         |
| F1066      | Isoniazid (high)              | <i>katG</i> N218fs     | 0.0%/6.9%               | Possible resistance mutations, not previously described |
| F1066      | Clofazimine – not tested      | <i>Rv1979c</i> G376D   | 0.0%/0.5%               |                                                         |
| F1067      | Isoniazid (high)              | <i>katG</i> N218fs     | 10.7%/7.6%              |                                                         |
| RF021      | Pyrazinamide – testing failed | <i>pncA</i> Q122H      | 0%/2.5%                 |                                                         |

458

459 Table 4. Resistance associated variants present as heterozygous alleles (HAs).

460

## 461   References

462

- 463   1.     Global Tuberculosis Report 2018. Geneva: World Health Organization; 2018 2018.
- 464   2.     Murray CJ, Ortblad KF, Guinovart C, Lim SS, Wolock TM, Roberts DA, et al. Global,  
465   regional, and national incidence and mortality for HIV, tuberculosis, and malaria during  
466   1990-2013: a systematic analysis for the Global Burden of Disease Study 2013. *Lancet*.  
467   2014;384(9947):1005-70.
- 468   3.     Dheda K, Gumbo T, Maartens G, Dooley KE, McNerney R, Murray M, et al. The  
469   epidemiology, pathogenesis, transmission, diagnosis, and management of multidrug-  
470   resistant, extensively drug-resistant, and incurable tuberculosis. *Lancet Respir Med*. 2017.
- 471   4.     WHO treatment guidelines for drug-resistant tuberculosis. World Health  
472   Organization; 2016.
- 473   5.     Trauner A, Liu Q, Via LE, Liu X, Ruan X, Liang L, et al. The within-host population  
474   dynamics of *Mycobacterium tuberculosis* vary with treatment efficacy. *Genome Biol*.  
475   2017;18(1):71.
- 476   6.     Olaru ID, Lange C, Heyckendorf J. Personalized medicine for patients with MDR-TB. *J*  
477   *Antimicrob Chemother*. 2016;71(4):852-5.
- 478   7.     Pasipanodya JG, McIlleron H, Burger A, Wash PA, Smith P, Gumbo T. Serum drug  
479   concentrations predictive of pulmonary tuberculosis outcomes. *J Infect Dis*.  
480   2013;208(9):1464-73.
- 481   8.     Cegielski JP, Kurbatova E, van der Walt M, Brand J, Ershova J, Tupasi T, et al.  
482   Multidrug-Resistant Tuberculosis Treatment Outcomes in Relation to Treatment and Initial  
483   Versus Acquired Second-Line Drug Resistance. *Clin Infect Dis*. 2016;62(4):418-30.
- 484   9.     Satta G, Lipman M, Smith GP, Arnold C, Kon OM, McHugh TD. *Mycobacterium*  
485   tuberculosis and whole-genome sequencing: how close are we to unleashing its full  
486   potential? *Clin Microbiol Infect*. 2017.
- 487   10.    Sreevatsan S, Pan X, Stockbauer KE, Connell ND, Kreiswirth BN, Whittam TS, et al.  
488   Restricted structural gene polymorphism in the *Mycobacterium tuberculosis* complex  
489   indicates evolutionarily recent global dissemination. *Proceedings of the National Academy*  
490   *of Sciences of the United States of America*. 1997;94(18):9869-74.
- 491   11.    Sun G, Luo T, Yang C, Dong X, Li J, Zhu Y, et al. Dynamic population changes in  
492   *Mycobacterium tuberculosis* during acquisition and fixation of drug resistance in patients. *J*  
493   *Infect Dis*. 2012;206(11):1724-33.
- 494   12.    Merker M, Kohl TA, Roetzer A, Truebe L, Richter E, Rüsck-Gerdes S, et al. Whole  
495   genome sequencing reveals complex evolution patterns of multidrug-resistant  
496   *Mycobacterium tuberculosis* Beijing strains in patients. *PLoS One*. 2013;8(12):e82551.
- 497   13.    Operario DJ, Koepfel AF, Turner SD, Bao Y, Pholwat S, Banu S, et al. Prevalence and  
498   extent of heteroresistance by next generation sequencing of multidrug-resistant  
499   tuberculosis. *PLoS One*. 2017;12(5):e0176522.
- 500   14.    Black PA, de Vos M, Louw GE, van der Merwe RG, Dippenaar A, Streicher EM, et al.  
501   Whole genome sequencing reveals genomic heterogeneity and antibiotic purification in  
502   *Mycobacterium tuberculosis* isolates. *BMC Genomics*. 2015;16(1):857.
- 503   15.    Eldholm V, Norheim G, von der Lippe B, Kinander W, Dahle UR, Caugant DA, et al.  
504   Evolution of extensively drug-resistant *Mycobacterium tuberculosis* from a susceptible  
505   ancestor in a single patient. *Genome Biol*. 2014;15(11):490.

- 506 16. Bloemberg GV, Keller PM, Stucki D, Stuckia D, Trauner A, Borrell S, et al. Acquired  
507 Resistance to Bedaquiline and Delamanid in Therapy for Tuberculosis. *N Engl J Med*.  
508 2015;373(20):1986-8.
- 509 17. Lieberman TD, Wilson D, Misra R, Xiong LL, Moodley P, Cohen T, et al. Genomic  
510 diversity in autopsy samples reveals within-host dissemination of HIV-associated  
511 *Mycobacterium tuberculosis*. *Nat Med*. 2016;22(12):1470-4.
- 512 18. Ford C, Yusim K, Ioerger T, Feng S, Chase M, Greene M, et al. *Mycobacterium*  
513 *tuberculosis*--heterogeneity revealed through whole genome sequencing. *Tuberculosis*  
514 (Edinb). 2012;92(3):194-201.
- 515 19. Metcalfe JZ, Streicher E, Theron G, Colman RE, Allender C, Lemmer D, et al. Cryptic  
516 Micro-heteroresistance Explains *M. tuberculosis* Phenotypic Resistance. *Am J Respir Crit*  
517 *Care Med*. 2017.
- 518 20. Bradley P, Gordon NC, Walker TM, Dunn L, Heys S, Huang B, et al. Rapid antibiotic-  
519 resistance predictions from genome sequence data for *Staphylococcus aureus* and  
520 *Mycobacterium tuberculosis*. *Nat Commun*. 2015;6:10063.
- 521 21. Feuerriegel S, Schleusener V, Beckert P, Kohl TA, Miotto P, Cirillo DM, et al.  
522 PhyResSE: a Web Tool Delineating *Mycobacterium tuberculosis* Antibiotic Resistance and  
523 Lineage from Whole-Genome Sequencing Data. *J Clin Microbiol*. 2015;53(6):1908-14.
- 524 22. Coll F, McNeerney R, Preston MD, Guerra-Assunção JA, Warry A, Hill-Cawthorne G, et  
525 al. Rapid determination of anti-tuberculosis drug resistance from whole-genome sequences.  
526 *Genome Med*. 2015;7(1):51.
- 527 23. Doughty EL, Sergeant MJ, Adetifa I, Antonio M, Pallen MJ. Culture-independent  
528 detection and characterisation of *Mycobacterium tuberculosis* and *M. africanum* in sputum  
529 samples using shotgun metagenomics on a benchtop sequencer. *PeerJ*. 2014;2:e585.
- 530 24. Bjorn-Mortensen K, Zallet J, Lillebaek T, Andersen AB, Niemann S, Rasmussen EM, et  
531 al. Direct DNA Extraction from *Mycobacterium tuberculosis* Frozen Stocks as a Reculture-  
532 Independent Approach to Whole-Genome Sequencing. *J Clin Microbiol*. 2015;53(8):2716-9.
- 533 25. Depledge DP, Palser AL, Watson SJ, Lai IY, Gray ER, Grant P, et al. Specific capture  
534 and whole-genome sequencing of viruses from clinical samples. *PLoS One*.  
535 2011;6(11):e27805.
- 536 26. Hanekom M, Streicher EM, Van de Berg D, Cox H, McDermid C, Bosman M, et al.  
537 Population structure of mixed *Mycobacterium tuberculosis* infection is strain genotype and  
538 culture medium dependent. *PLoS One*. 2013;8(7):e70178.
- 539 27. Martin A, Herranz M, Ruiz Serrano MJ, Bouza E, Garcia de Viedma D. The clonal  
540 composition of *Mycobacterium tuberculosis* in clinical specimens could be modified by  
541 culture. *Tuberculosis (Edinb)*. 2010;90(3):201-7.
- 542 28. Metcalfe JZ, Streicher E, Theron G, Colman RE, Penaloza R, Allender C, et al.  
543 *Mycobacterium tuberculosis* subculture results in loss of potentially clinically relevant  
544 heteroresistance. *Antimicrob Agents Chemother*. 2017.
- 545 29. Jain P, Weinrick BC, Kalivoda EJ, Yang H, Munsamy V, Vilcheze C, et al. Dual-Reporter  
546 *Mycobacteriophages* (Phi2DRMs) Reveal Preexisting *Mycobacterium tuberculosis* Persistent  
547 Cells in Human Sputum. *MBio*. 2016;7(5).
- 548 30. Mukamolova GV, Turapov O, Malkin J, Woltmann G, Barer MR. Resuscitation-  
549 promoting factors reveal an occult population of tubercle Bacilli in Sputum. *Am J Respir Crit*  
550 *Care Med*. 2010;181(2):174-80.

- 551 31. Votintseva AA, Bradley P, Pankhurst L, Del Ojo Elias C, Loose M, Nilgiriwala K, et al.  
552 Same-day diagnostic and surveillance data for tuberculosis via whole genome sequencing of  
553 direct respiratory samples. *J Clin Microbiol*. 2017.
- 554 32. Brown AC, Bryant JM, Einer-Jensen K, Holdstock J, Houniet DT, Chan JZ, et al. Rapid  
555 Whole-Genome Sequencing of Mycobacterium tuberculosis Isolates Directly from Clinical  
556 Samples. *J Clin Microbiol*. 2015;53(7):2230-7.
- 557 33. Doyle RM, Burgess C, Williams R, Gorton R, Booth H, Brown J, et al. Direct whole  
558 genome sequencing of sputum accurately identifies drug resistant Mycobacterium  
559 tuberculosis faster than MGIT culture sequencing. *J Clin Microbiol*. 2018.
- 560 34. Nimmo C, Doyle R, Burgess C, Williams R, Gorton R, McHugh TD, et al. Rapid  
561 identification of a Mycobacterium tuberculosis full genetic drug resistance profile through  
562 whole genome sequencing directly from sputum. *Int J Infect Dis*. 2017;62:44-6.
- 563 35. Consortium CR, the GP, Allix-Beguec C, Arandjelovic I, Bi L, Beckert P, et al. Prediction  
564 of Susceptibility to First-Line Tuberculosis Drugs by DNA Sequencing. *N Engl J Med*.  
565 2018;379(15):1403-15.
- 566 36. Walker TM, Kohl TA, Omar SV, Hedge J, Del Ojo Elias C, Bradley P, et al. Whole-  
567 genome sequencing for prediction of Mycobacterium tuberculosis drug susceptibility and  
568 resistance: a retrospective cohort study. *Lancet Infect Dis*. 2015;15(10):1193-202.
- 569 37. Malik S, Willby M, Sikes D, Tsodikov OV, Posey JE. New insights into fluoroquinolone  
570 resistance in Mycobacterium tuberculosis: functional genetic analysis of gyrA and gyrB  
571 mutations. *PLoS One*. 2012;7(6):e39754.
- 572 38. Coll F, McNeerney R, Guerra-Assuncao JA, Glynn JR, Perdigao J, Viveiros M, et al. A  
573 robust SNP barcode for typing Mycobacterium tuberculosis complex strains. *Nat Commun*.  
574 2014;5:4812.
- 575 39. Sobkowiak B, Glynn JR, Houben R, Mallard K, Phelan JE, Guerra-Assuncao JA, et al.  
576 Identifying mixed Mycobacterium tuberculosis infections from whole genome sequence  
577 data. *BMC Genomics*. 2018;19(1):613.
- 578 40. Konstantinidis KT, Tiedje JM. Prokaryotic taxonomy and phylogeny in the genomic  
579 era: advancements and challenges ahead. *Curr Opin Microbiol*. 2007;10(5):504-9.
- 580 41. Heym B, Alzari PM, Honore N, Cole ST. Missense mutations in the catalase-  
581 peroxidase gene, katG, are associated with isoniazid resistance in Mycobacterium  
582 tuberculosis. *Mol Microbiol*. 1995;15(2):235-45.
- 583 42. Coll F, Phelan J, Hill-Cawthorne GA, Nair MB, Mallard K, Ali S, et al. Genome-wide  
584 analysis of multi- and extensively drug-resistant Mycobacterium tuberculosis. *Nat Genet*.  
585 2018;50(2):307-16.
- 586 43. Sam IC, Drobniewski F, More P, Kemp M, Brown T. Mycobacterium tuberculosis and  
587 rifampin resistance, United Kingdom. *Emerg Infect Dis*. 2006;12(5):752-9.
- 588 44. Larsen MH, Biermann K, Tandberg S, Hsu T, Jacobs WR. Genetic Manipulation of  
589 Mycobacterium tuberculosis. *Curr Protoc Microbiol*. 2007;Chapter 10:Unit 10A.2.
- 590 45. Krueger F. TrimGalore [Available from: <https://github.com/FelixKrueger/TrimGalore>.  
591 46. Bushnell B. BBMap [cited 2019 18 Mar]. Available from: [https://jgi.doe.gov/data-  
592 and-tools/bbtools/](https://jgi.doe.gov/data-and-tools/bbtools/).
- 593 47. Picard Tools: Broad Institute; [Available from:  
594 <http://broadinstitute.github.io/picard/>.  
595 48. Okonechnikov K, Conesa A, Garcia-Alcalde F. Qualimap 2: advanced multi-sample  
596 quality control for high-throughput sequencing data. *Bioinformatics*. 2016;32(2):292-4.

- 597 49. Garrison E, Marth G. Haplotype-based variant detection from short-read sequencing.  
598 arXiv preprint arXiv:12073907. 2012.
- 599 50. Garrison E. Vcflib [Available from: <https://github.com/vcflib/vcflib>.  
600 51. Koboldt DC, Zhang Q, Larson DE, Shen D, McLellan MD, Lin L, et al. VarScan 2:  
601 somatic mutation and copy number alteration discovery in cancer by exome sequencing.  
602 Genome Res. 2012;22(3):568-76.
- 603 52. Page AJ, Taylor B, Delaney AJ, Soares J, Seemann T, Keane JA, et al. SNP-sites: rapid  
604 efficient extraction of SNPs from multi-FASTA alignments. Microb Genom.  
605 2016;2(4):e000056.
- 606 53. Seemann T. snp-dists [Available from: <https://github.com/tseemann/snp-dists>.  
607 54. Stamatakis A. RAxML version 8: a tool for phylogenetic analysis and post-analysis of  
608 large phylogenies. Bioinformatics. 2014;30(9):1312-3.
- 609 55. Wood DE, Salzberg SL. Kraken: ultrafast metagenomic sequence classification using  
610 exact alignments. Genome Biol. 2014;15(3):R46.
- 611 56. Lassalle F, Spagnoletti M, Fumagalli M, Shaw L, Dyble M, Walker C, et al. Oral  
612 microbiomes from hunter-gatherers and traditional farmers reveal shifts in commensal  
613 balance and pathogen load linked to diet. Mol Ecol. 2018;27(1):182-95.
- 614 57. Camacho C, Coulouris G, Avagyan V, Ma N, Papadopoulos J, Bealer K, et al. BLAST+:  
615 architecture and applications. BMC Bioinformatics. 2009;10:421.
- 616 58. Yang C, Luo T, Shen X, Wu J, Gan M, Xu P, et al. Transmission of multidrug-resistant  
617 Mycobacterium tuberculosis in Shanghai, China: a retrospective observational study using  
618 whole-genome sequencing and epidemiological investigation. Lancet Infect Dis.  
619 2017;17(3):275-84.
- 620 59. Eldholm V, Monteserin J, Rieux A, Lopez B, Sobkowiak B, Ritacco V, et al. Four  
621 decades of transmission of a multidrug-resistant Mycobacterium tuberculosis outbreak  
622 strain. Nat Commun. 2015;6:7119.
- 623

624

625 **Figure legends**

626

627 Figure 1. Variation in total number of heterozygous alleles (HAs) identified across all 36  
628 patients in sequences generated from sputum and MGIT depending on minimum supporting  
629 read count threshold.

630

631 Figure 2. Number of heterozygous alleles (HAs) found in directly sequenced sputum only  
632 (sputum), MGIT (MGIT) only or in both samples (shared) by patient.

633

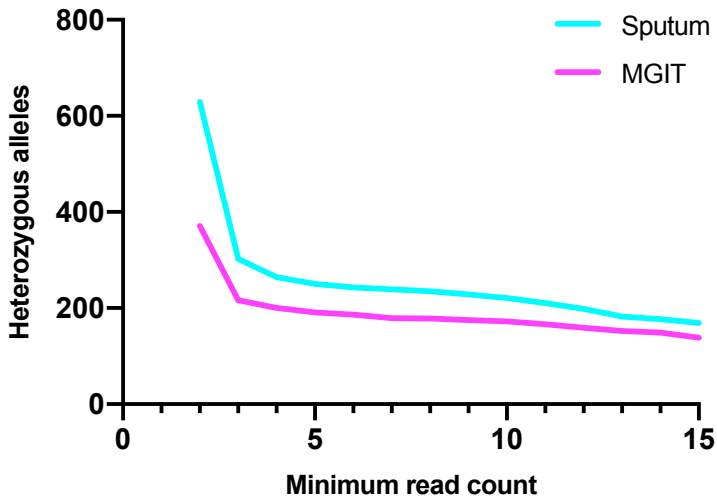

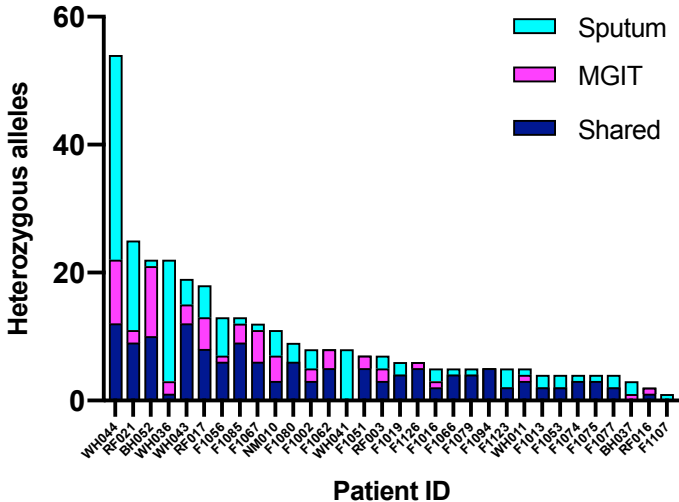

Source: http://biorxiv.org/content/10.1101/446849v3.full.pdf
